# Supplementary material for: Aniline-based hole transporting materials for high-performance organic solar cells with enhanced ambient stability
Source: Royal Society of Chemistry journal article supplement (doi:10.1039/d1ta03665c), 2021-01-01
Supplement: d1ta03665c1.pdf [file d1ta03665c1.pdf]

**Supplementary Information for**

**Aniline-based Hole Transporting Materials for High-Performance  
Organic Solar Cells with Enhanced Ambient Stability**

*Tan Ngoc-Lan Phan<sup>†,a</sup>, Jinseck Kim<sup>†,a</sup>, Geon-U Kim<sup>a</sup>, Seungjin Lee<sup>a</sup>, and Bumjoon J. Kim<sup>a,\*</sup>*

<sup>a</sup>Department of Chemical and Biomolecular Engineering, Korea Advanced Institute of Science and Technology (KAIST), Daejeon 34141, Republic of Korea

\*Electronic mail: [bumjoonkim@kaist.ac.kr](mailto:bumjoonkim@kaist.ac.kr)

## Table of Contents

### Experimental Section

Material Characterizations

Device Characterizations

### Supplementary Fig. S1-12

- **Fig. S1.**  $^1\text{H}$  NMR spectrum of PBD.
- **Fig. S2.**  $^1\text{H}$  NMR spectrum of PFBSA.
- **Fig. S3.**  $^{19}\text{F}$  NMR spectrum of PFBSA.
- **Fig. S4.** (a) Mass spectrum of PBD. (b) MALDI-TOF spectra of PFBSA in linear negative mode, and (c) in reflector negative mode.
- **Fig. S5.** DSC thermograms during the 1<sup>st</sup> cooling and 2<sup>nd</sup> heating cycles of (a) PBD, (b) PFBSA and (c) PBD:PFBSA blends with different doping ratios.
- **Fig. S6.** UV-Vis absorption spectra of as-cast and annealed films from PBD:PFBSA with doping ratios of (a) 2:1 and (b) 1:2.
- **Fig. S7.** UPS spectra of the bare ITO, PEDOT:PSS, PBD, PFBSA and PBD:PFBSA (different doping ratios)-coated ITO.
- **Fig. S8.** UV-Vis absorption spectra of the PBD:PFBSA films with doping ratio of (a) 2:1, (b) 1:1 and (c) 1:2, before (solid curves) and after rinsing (short dot curves) with chlorobenzene and chloroform.
- **Fig. S9.** (a) UV-Vis absorption spectra of PBD:PFBSA (1:1) films after thermal annealing at 90 °C with various thickness controlled by solution concentrations. (b) Extrapolation curve constructed from absorption-thickness relationship of PBD:PFBSA (1:1) films.
- **Fig. S10.** AFM height images of films from (a) bare ITO, (b) ITO/PEDOT:PSS, ITO/PBD:PFBSA (1:1) (c) as-cast (a-s), (d) after one-step annealing at 250 °C for 10 min (1-s), (e) two-step thermal annealing at 90 °C for 15 min and 250 °C for 10 min (2-s), respectively.
- **Fig. S11.** (a) Chemical structure of PBDB-T and N2200 active layer materials used in versatility study. (b) *J-V* curves and (c) EQE curves of the OSC devices fabricated with PEDOT:PSS and PBD:PFBSA (1:1).

- **Fig. S12.** Photographs of pH test using pH meter for PEDOT:PSS and PBD:PFBSA (different doping ratios) solutions.

#### **Supplementary Table S1-4**

- **Table S1.** PBD:PFBSA film thicknesses and OOP conductances for conductivity calculation.
- **Table S2.** Photovoltaic performance of OSC employing PBD:PFBSA (1:1) as HTL with different solution concentration.
- **Table S3.** Photovoltaic performance of OSC employing PBD:PFBSA (1:1) as HTL with different annealing conditions.
- **Table S4.** Summary of OSC performances employing various aniline-based hole transport layers.

## Experimental section

### Material Characterizations

$^1\text{H}$  and  $^{19}\text{F}$  nuclear magnetic resonance (NMR) spectra of synthesized PBD and PFBSA were obtained from a Bruker AVANCE III HD Nanobay instrument ( $^1\text{H}$  NMR at 400 MHz, and  $^{19}\text{F}$  NMR at 376 MHz) using  $\text{DMSO-}d_6$  as solvent. Bruker Autoflex matrix-assisted laser desorption/ionization-time of flight (MALDI-TOF) mass spectrometer or Thermo Fisher Ultimate-3000 ISQ EC liquid chromatograph mass spectrometer were used to measure the molecular weights of synthesized products. Differential scanning calorimetry (DSC) measurements were accomplished by DSC Q200 from TA Instruments (USA) under nitrogen, with both heating and cooling rates of  $10\text{ }^\circ\text{C min}^{-1}$ . UV–Vis absorption spectra were observed at room temperature by a Shimadzu UV-1800 spectrophotometer. Ultraviolet photoelectron spectroscopy (UPS) and X-ray photoelectron spectroscopy (XPS) measurements were performed on a multipurpose X-Ray photoelectron spectrometer (Thermo VG Scientific). Water contact angle (WCA) measurement was analyzed by contact angle analyzer Phoenix 150 (Surface & Electro Optics Co., Ltd.) using deionized water droplets. Atomic force microscopy (AFM) height images were observed under ambient conditions using a ScanAsyst mode by MultiMode 8 instrument (Bruker). The thickness was obtained from AFM measurement, along with the extrapolation from an absorption-thickness plot in which the absorption probed at 423 nm after the thermal annealing at  $90\text{ }^\circ\text{C}$ . The pH meter measurements were tested by OHAUS Starter 300 pH meter.

## Device Characterizations

The effective area of completed cells was probed by an optical microscopy as  $0.164 \text{ cm}^2$ . The current density–voltage curves of the devices were quantified by Keithley 2400 SMU Sourcemeter and McScience Inc. K201 LAB55 solar simulator under  $100 \text{ mW cm}^{-2}$  light irradiation from Xe short-arc lamp provided by the power of 150 W, filtered by a 1.5 G air mass, qualifying the Class AAA of ASTM Standards. The calibration process of light intensity before the measurements was performed employing a McScience Inc. K801S-K302 Si reference cell. EQE spectra of devices were examined by a K3100 IQX instrument (McScience Inc.) using light from a 300 W Xe arc lamp, and MC 200 optical chopper (Thorlabs) under ambient conditions. The obtained  $J_{\text{scs}}$  were consistent with the calculated  $J_{\text{scs}}$  from EQE spectra within 5% error.

## Structural characterization of PBD and PFBSA

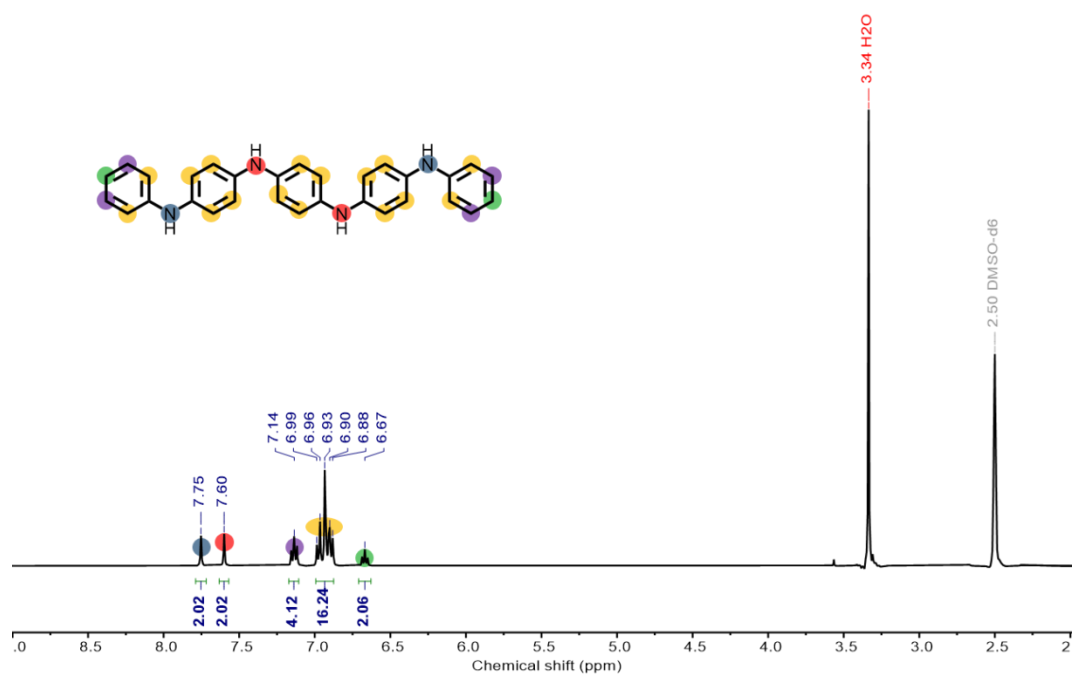

**Fig. S1.** <sup>1</sup>H NMR spectrum of PBD.

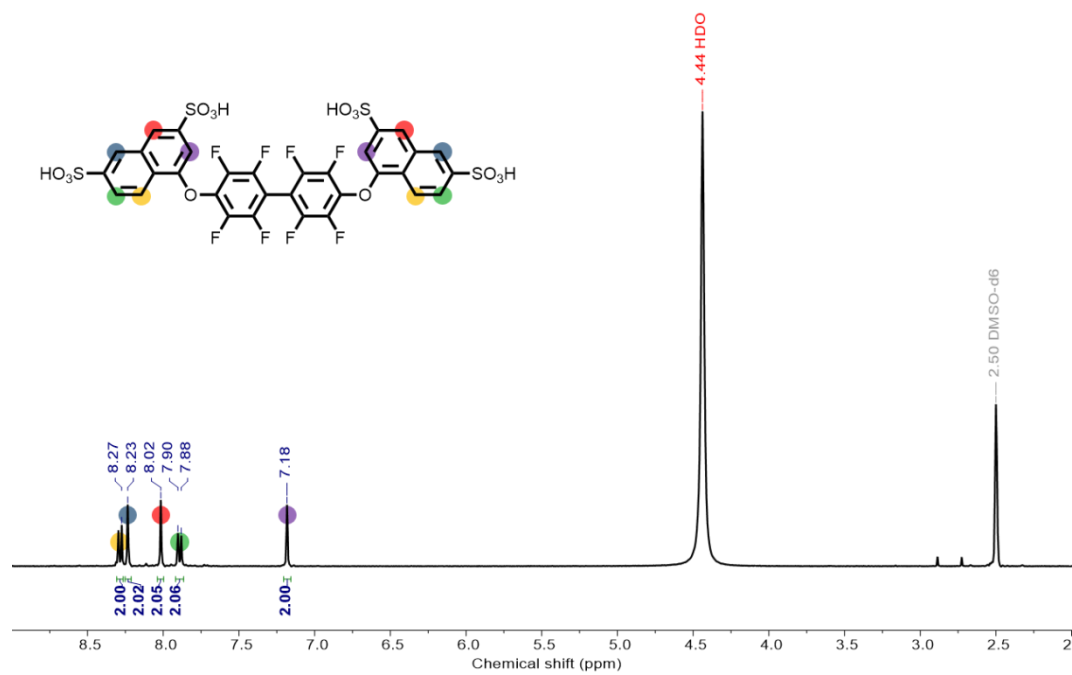

**Fig. S2.** <sup>1</sup>H NMR spectrum of PFBSA.

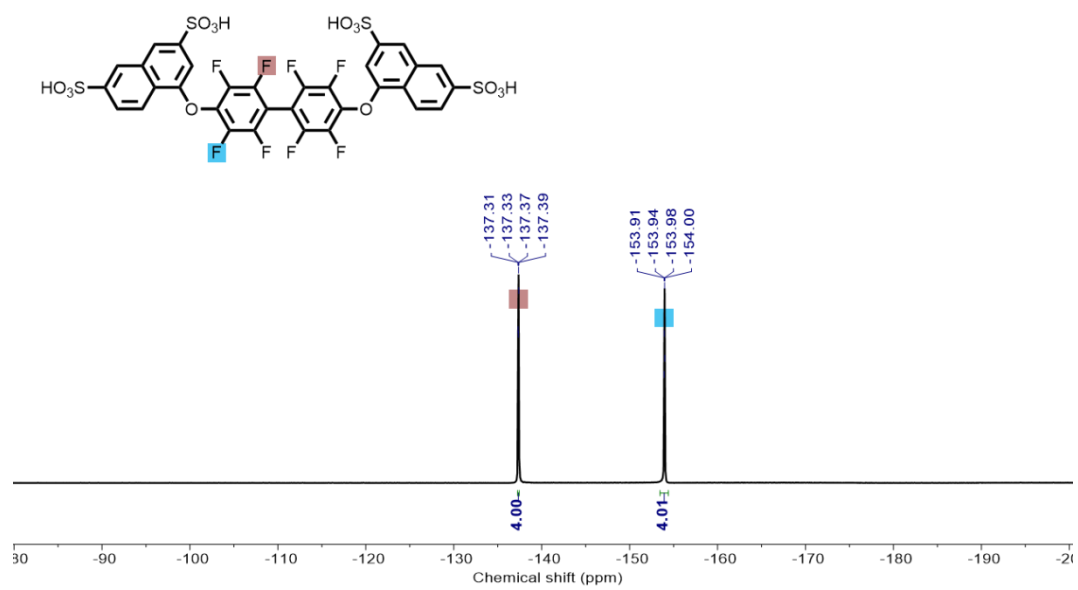

**Fig. S3.**  $^{19}\text{F}$  NMR spectrum of PFBSA.

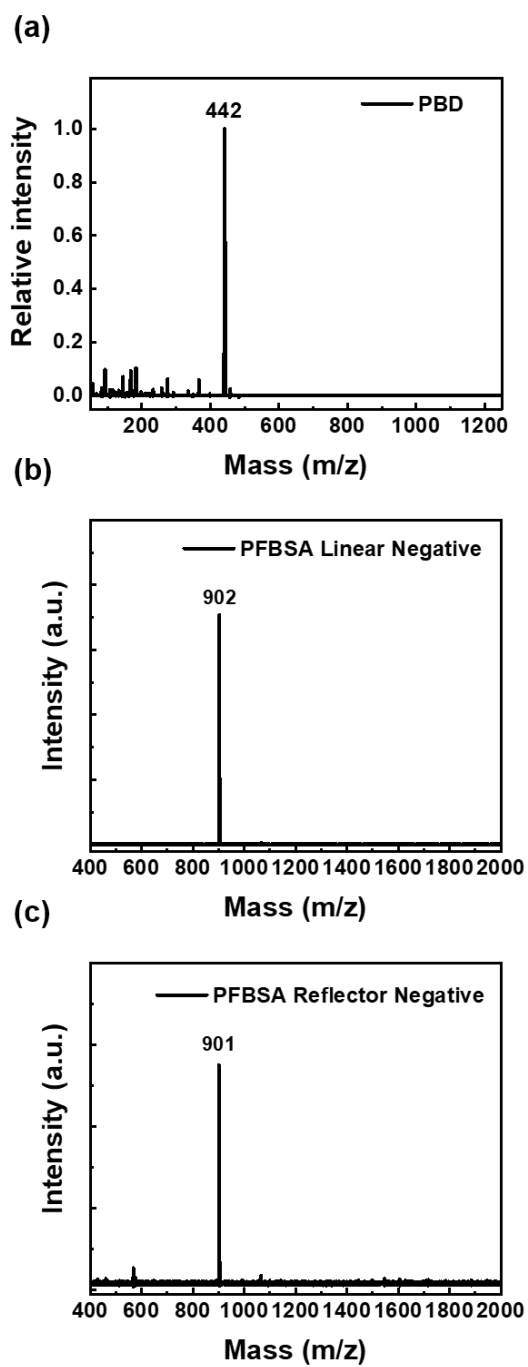

**Fig. S4.** (a) Mass spectrum of PBD. (b) MALDI-TOF spectra of PFBSA in linear negative mode, and (c) in reflector negative mode.



## Crystalline behaviors of PBD, PFBSA, and PBD:PFBSA blends

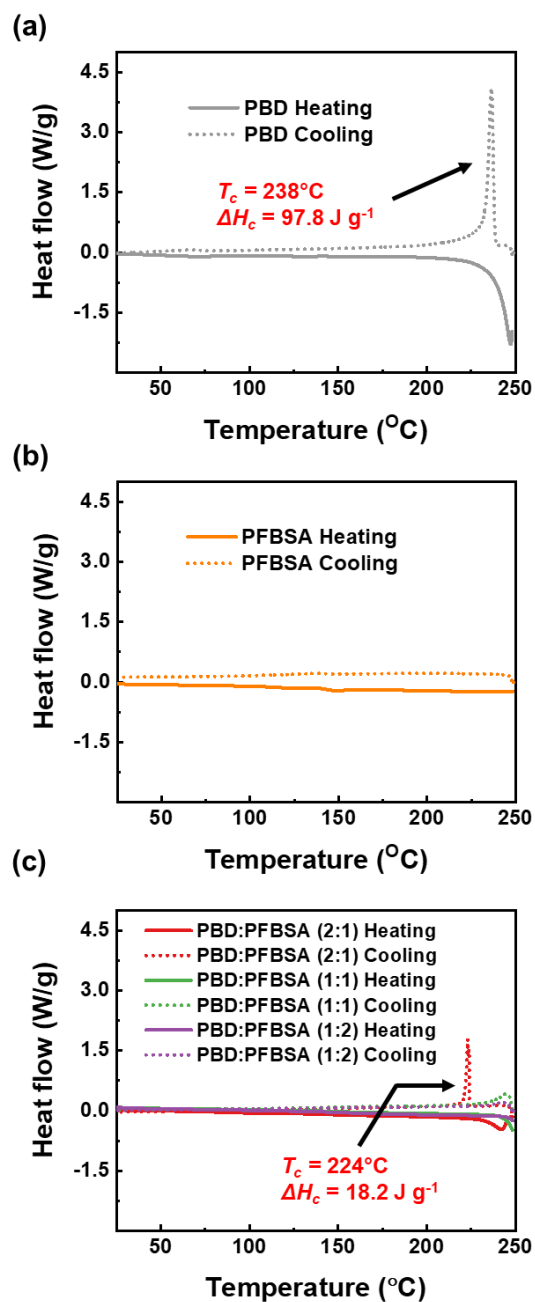

**Fig. S5.** DSC thermograms during the 1<sup>st</sup> cooling and 2<sup>nd</sup> heating cycles of (a) PBD, (b) PFBSA and (c) PBD:PFBSA blends with different doping ratios.

## Absorption spectra after annealing process

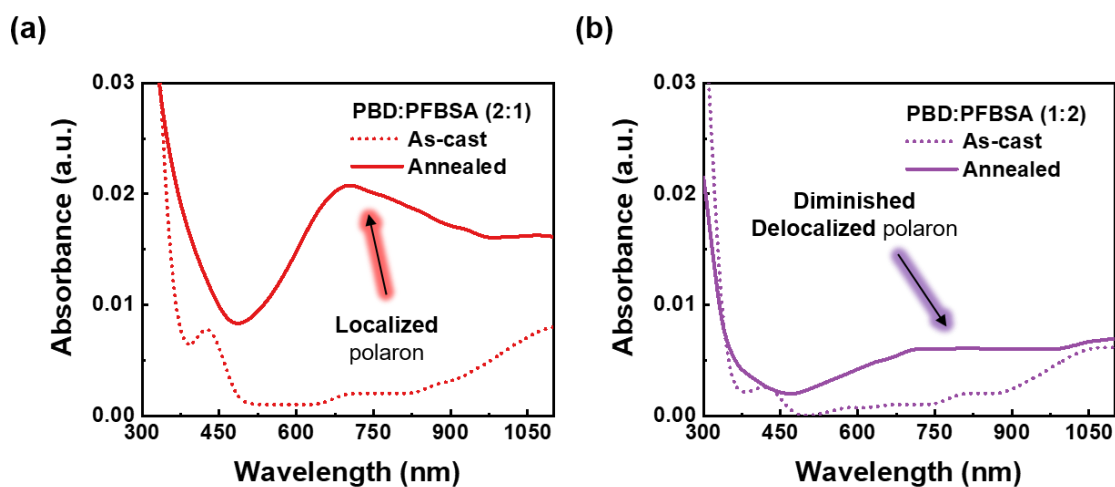

**Fig. S6.** UV-Vis absorption spectra of as-cast and annealed films from PBD:PFBSA with doping ratios of (a) 2:1 and (b) 1:2.

## Work function

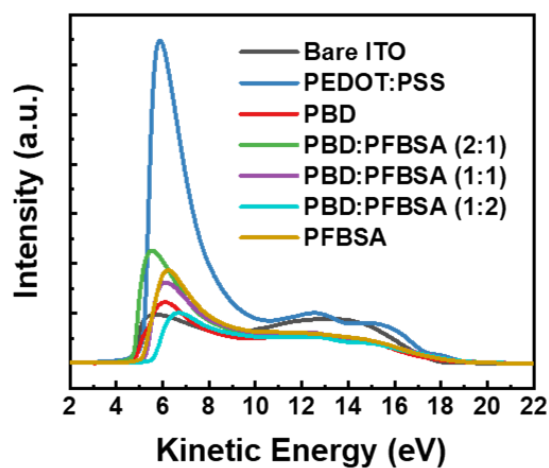

**Fig. S7.** UPS spectra of the bare ITO, PEDOT:PSS, PBD, PFBSA and PBD:PFBSA (different doping ratios)-coated ITO.

## Parameters to calculate out-of-plane conductivity

**Table S1.** PBD:PFBSA film thicknesses and out-of-plane (OOP) conductances for conductivity calculation.

| Material  | Doping ratio | Thickness (nm) | Conductance <sup>a</sup> (S) |
|-----------|--------------|----------------|------------------------------|
| PEDOT:PSS | 1:6          | 43.5           | 0.047                        |
| PBD:PFBSA | 2:1          | 30.7           | 0.029                        |
|           | 1:1          | 30.3           | 0.101                        |
|           | 1:2          | 31.6           | 0.063                        |

\* Device area of all measured samples is 0.164 cm<sup>2</sup>. <sup>a</sup> Determined by the slope of  $I$ - $V$  curve in the dark.

## Solvent orthogonality

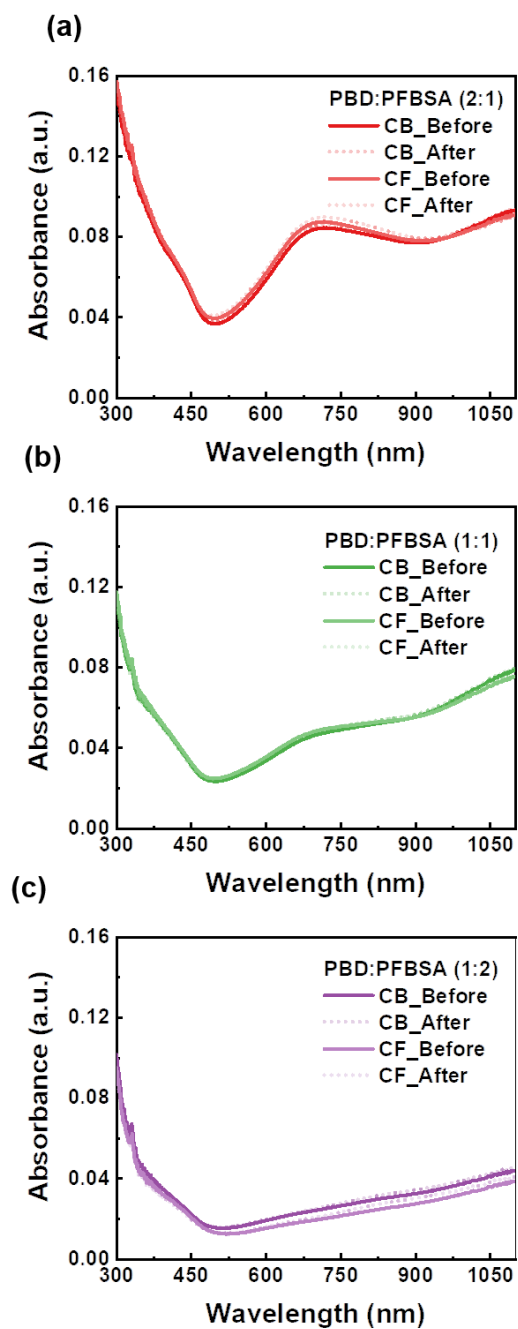

**Fig. S8.** UV-Vis absorption spectra of the PBD:PFBSA films with doping ratio of (a) 2:1, (b) 1:1 and (c) 1:2, before (solid curves) and after rinsing (short dot curves) with chlorobenzene and chloroform.

## Thickness-absorption extrapolation curve

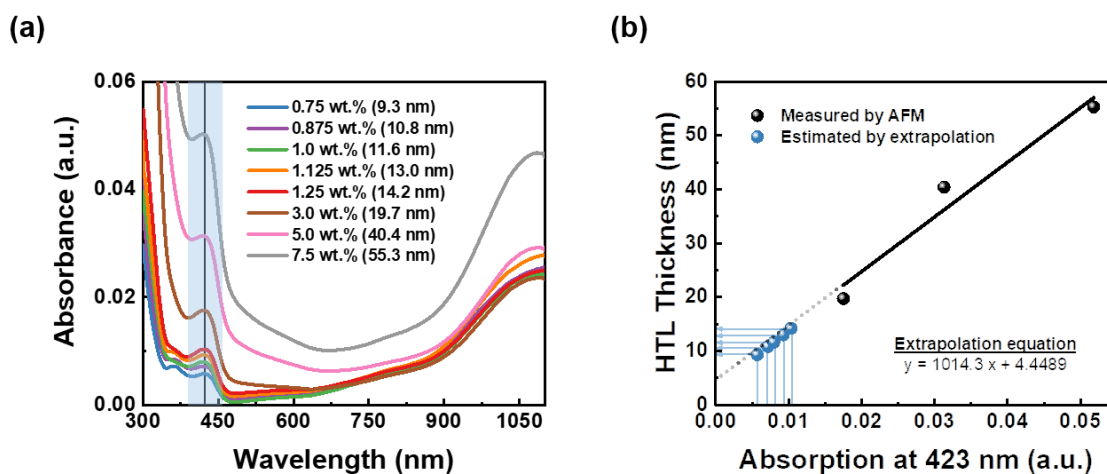

**Fig. S9.** (a) UV-Vis absorption spectra of PBD:PFBSA (1:1) films after thermal annealing at 90 °C with various thickness controlled by solution concentrations. (b) Extrapolation curve constructed from absorption-thickness relationship of PBD:PFBSA (1:1) films.

## Optimization process of OSCs with PM6:Y6 active layer system

**Table S2.** Photovoltaic performance of OSC employing PBD:PFBSA (1:1) as HTL with different solution concentration. (Processing solvent is DMAc and HTLs were annealed at 250 °C for 10 min).

| Concentration (wt/vol %) | Thickness (nm) | $V_{OC}$ (V) | $J_{SC}$ (mA cm <sup>-2</sup> ) | FF   | PCE (%) |
|--------------------------|----------------|--------------|---------------------------------|------|---------|
| 0.75                     | 9.3            | 0.83         | 22.12                           | 0.69 | 12.66   |
| 0.875                    | 10.8           | 0.85         | 22.65                           | 0.69 | 13.32   |
| 1.0                      | 11.6           | 0.85         | 22.86                           | 0.70 | 13.71   |
| 1.125                    | 13.0           | 0.85         | 22.18                           | 0.70 | 13.37   |
| 1.25                     | 14.2           | 0.86         | 21.63                           | 0.69 | 12.75   |

**Table S3.** Photovoltaic performance of OSC employing PBD:PFBSA (1:1) as HTL with different annealing conditions. (Processing solvent is DMAc and solution concentration is 1.0 wt/vol%).

| 1 <sup>st</sup> step |                | 2 <sup>nd</sup> step |                | $V_{OC}$ (V) | $J_{SC}$ (mA cm <sup>-2</sup> ) | FF   | PCE (%) |
|----------------------|----------------|----------------------|----------------|--------------|---------------------------------|------|---------|
| Temperature (°C)     | Duration (min) | Temperature (°C)     | Duration (min) |              |                                 |      |         |
| -                    | -              | 250                  | 10             | 0.85         | 22.86                           | 0.70 | 13.71   |
| 90                   | 15             | 250                  | 5              | 0.85         | 23.77                           | 0.71 | 14.51   |
| 90                   | 15             | 250                  | 10             | 0.84         | 25.33                           | 0.72 | 15.24   |
| 90                   | 15             | 250                  | 20             | 0.85         | 24.01                           | 0.68 | 13.75   |

## Morphology change of ITO modified with PEDOT:PSS and PBD:PFBSA (1:1) HTL

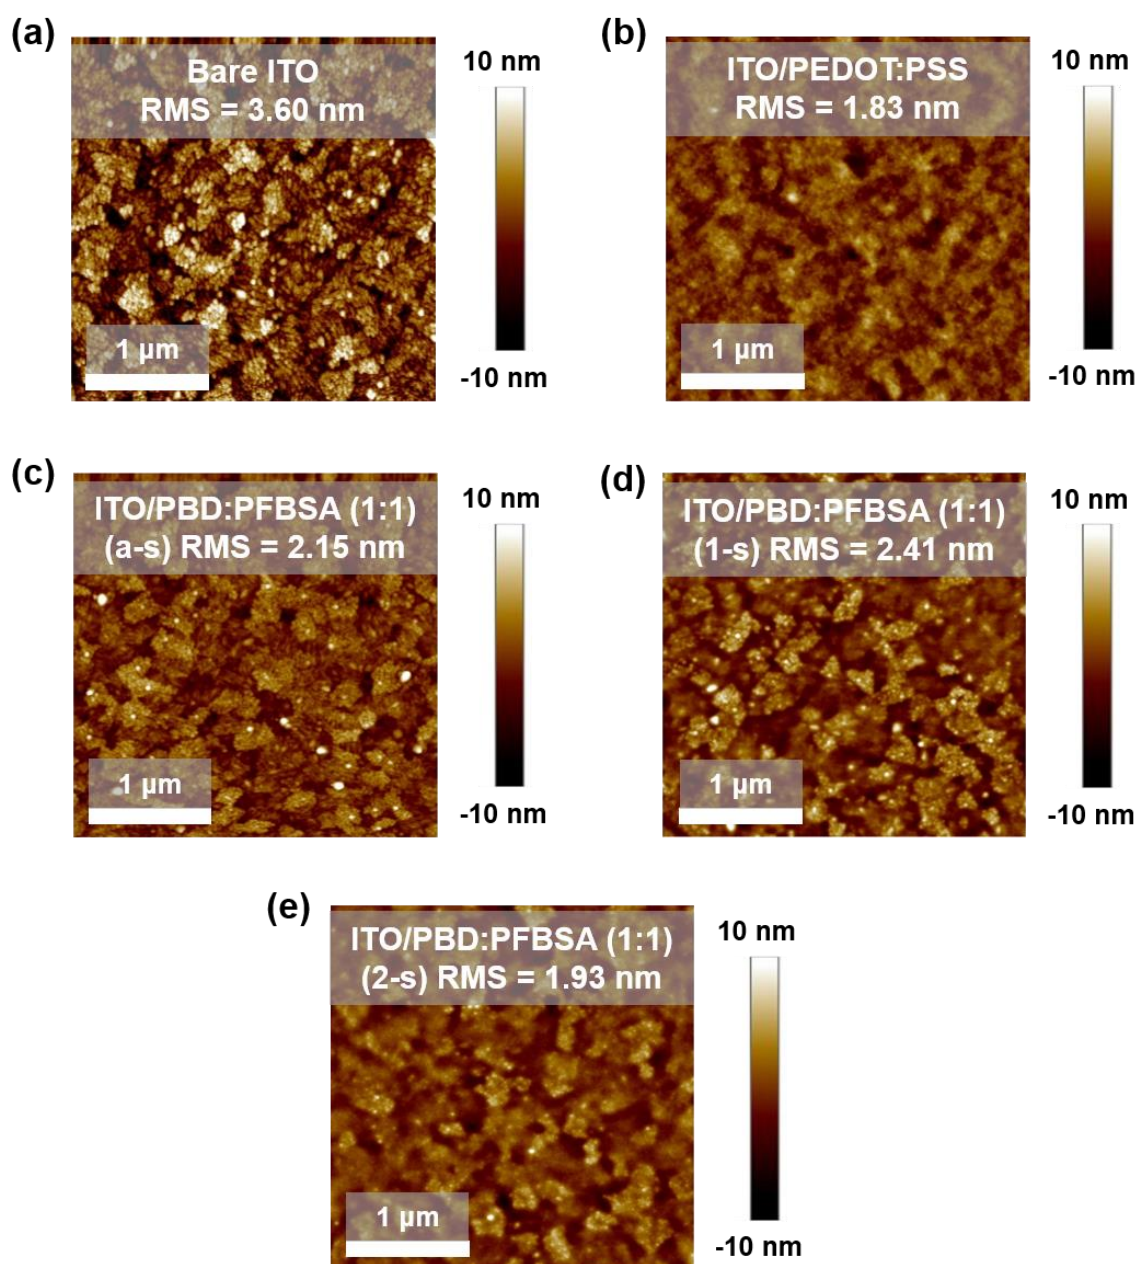

**Fig. S10.** AFM height images of films from (a) bare ITO, (b) ITO/PEDOT:PSS, ITO/PBD:PFBSA (1:1) (c) as-cast (a-s), (d) after one-step annealing at 250  $^{\circ}\text{C}$  for 10 min (1-s), (e) two-step thermal annealing at 90  $^{\circ}\text{C}$  for 15 min and 250  $^{\circ}\text{C}$  for 10 min (2-s), respectively.

## Summary of reported ani-HTLs

**Table S4.** Summary of OSC performance employing various ani-HTLs

| Doping type          | Aniline-based HTL              | Active layer                   | PCE (%)   | Ref. |
|----------------------|--------------------------------|--------------------------------|-----------|------|
| Self-doping          | SAS10- <i>gr</i> -PSSA         | P3HT:PC <sub>61</sub> BM       | 3.42      | [1]  |
|                      | SPAN                           | P3HT:PC <sub>61</sub> BM       | 3.54      | [2]  |
|                      | PSSS- <i>g</i> -PANI           | P3HT:PC <sub>61</sub> BM       | 3.99      | [3]  |
|                      | PSSA- <i>g</i> -PANI/GO        | P3HT:PC <sub>61</sub> BM       | 4.23      | [4]  |
|                      | SPAN(SH)@GNP                   | P3HT:ICBA                      | 5.19      | [5]  |
|                      | PDAS                           | PM6:BTP-4F-12                  | 16.2      | [6]  |
| Protonic acid doping | PANI:CSA (HP-PANI)             | P3HT:PC <sub>61</sub> BM       | 1.3       | [7]  |
|                      | PANI/PEDOT:PSS                 | P3HT:PC <sub>61</sub> BM       | 2.76      | [8]  |
|                      | PANI:PSS (1:1.5)               | P3HT:ICBA                      | 3.5       | [9]  |
|                      | HAPAN                          | P3HT:PC <sub>71</sub> BM       | 3.70      | [10] |
|                      | PANI:PSS (1:0.5)               | P3HT:ICBA                      | 4.0       | [9]  |
|                      | PANI:PSS (1:1)                 | P3HT:ICBA                      | 4.5       | [9]  |
|                      | HAPAN                          | PBTTDPP-T:PC <sub>71</sub> BM  | 5.99      | [10] |
|                      |                                | PDPP3T:PC <sub>71</sub> BM     | 7.13      | [10] |
|                      |                                | PBDTBDD:PC <sub>71</sub> BM    | 7.20      | [10] |
|                      |                                | PTB7:PC <sub>71</sub> BM       | 7.64      | [10] |
|                      |                                | PBDTTT-C-T:PC <sub>71</sub> BM | 7.71      | [10] |
|                      | PBDTTT-EFT:PC <sub>71</sub> BM | 9.05                           | [10]      |      |
| PBD:PFBSA (1:1)      | PM6:Y6                         | 15.24                          | This work |      |



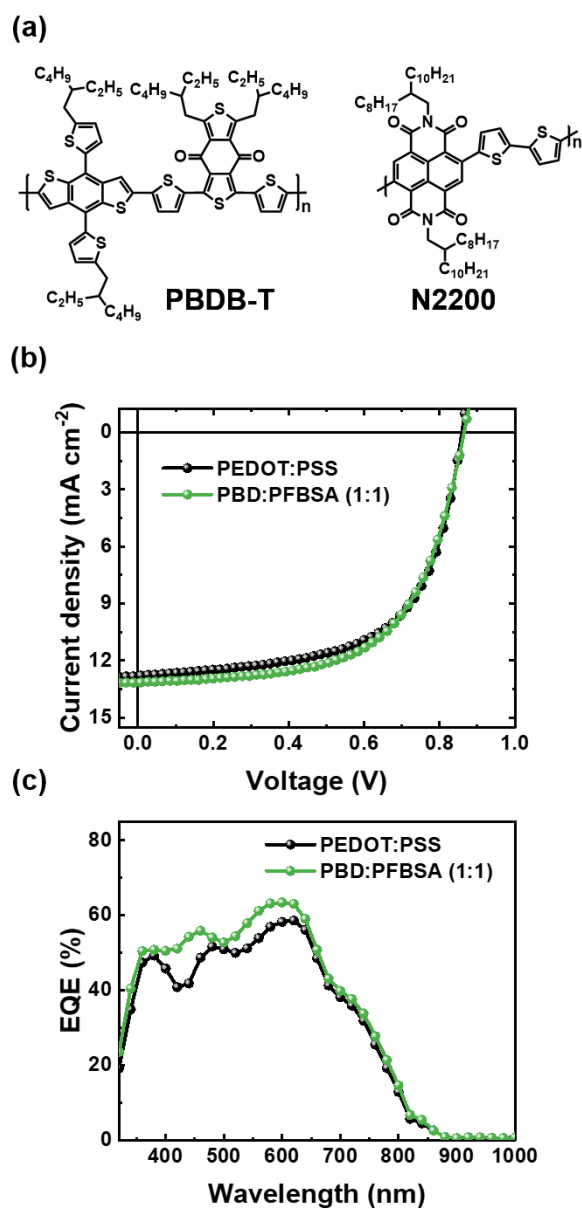

**Fig. S11.** (a) Chemical structure of PBDB-T and N2200 active layer materials used in versatility study. (b)  $J$ - $V$  curves and (c) EQE curves of the OSC devices fabricated with PEDOT:PSS and PBD:PFBSA (1:1).

## pH measurement

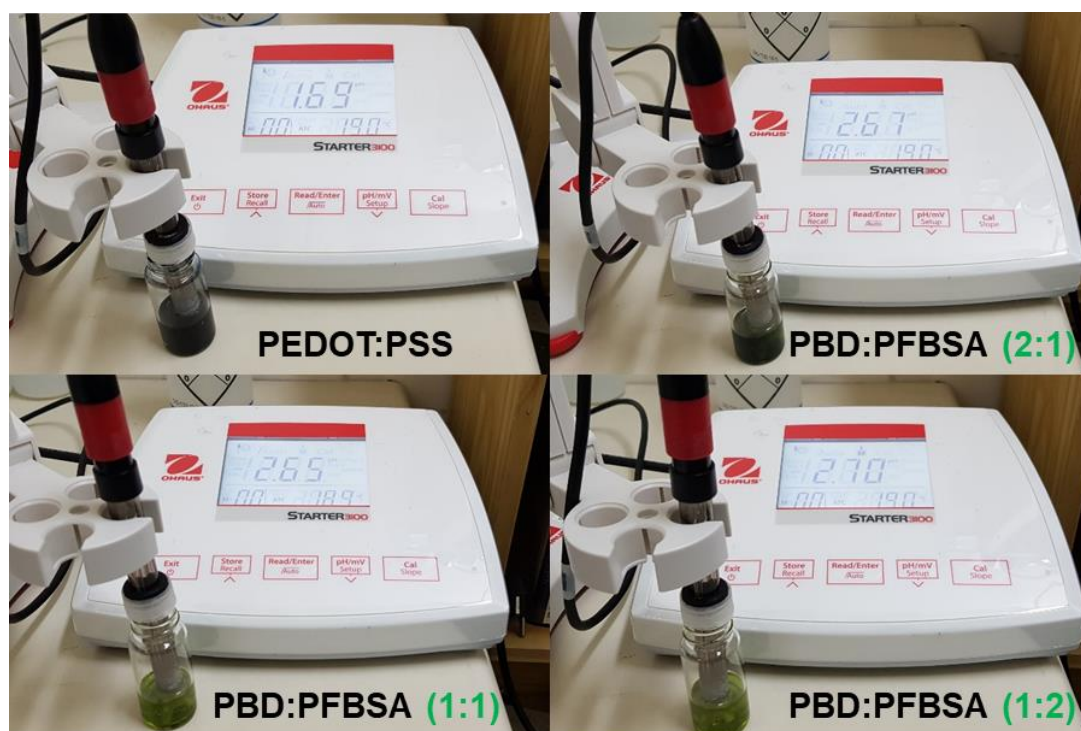

**Fig. S12.** Photographs of pH test using pH meter for PEDOT:PSS and PBD:PFBSA (different doping ratios) solutions.

## References

- 1 T. H. Lim, K. W. Oh and S. H. Kim, *Synth. Met.*, 2012, **162**, 268-275.
- 2 W.-J. Ke, G.-H. Lin, C.-P. Hsu, C.-M. Chen, Y.-S. Cheng, T.-H. Jen and S.-A. Chen, *J. Mater. Chem.*, 2011, **21**, 13483-13489.
- 3 J. W. Jung, J. U. Lee and W. H. Jo, *J. Phys. Chem. C*, 2010, **114**, 633-637.
- 4 S. Bae, J. U. Lee, H.-s. Park, E. H. Jung, J. W. Jung and W. H. Jo, *Sol. Energy Mater. Sol. Cells*, 2014, **130**, 599-604.
- 5 S.-A. Gopalan, A.-I. Gopalan, A. Vinu, K.-P. Lee and S.-W. Kang, *Sol. Energy Mater. Sol. Cells*, 2018, **174**, 112-123.
- 6 M. Zeng, W. Zhu, J. Luo, N. Song, Y. Li, Z. Chen, Y. Zhang, Z. Wang, W. Liang, B. Guo, K. Zhang, F. Huang and Y. Cao, *Sol. RRL*, 2021, **5**, 2000625.
- 7 O. Abdulrazzaq, S. E. Bourdo, V. Saini, V. G. Bairi, E. Dervishi , T. Viswanathan, Z. A. Nima and A. S. Biris, *Energy Technol.*, 2013, **1**, 463-470.
- 8 Y.-K. Han, M.-Y. Chang, K.-S. Ho, T.-H. Hsieh, J.-L. Tsai and P.-C. Huang, *Sol. Energy Mater. Sol. Cells*, 2014, **128**, 198-203.
- 9 S. Biswas, Y.-J. You, J. Kim, S. R. Ha, H. Choi, S.-H. Kwon, K.-K. Kim, J. W. Shim and H. Kim, *Appl. Surf. Sci.*, 2020, **512**, 145700.
- 10 W. Zhao, L. Ye, S. Zhang, B. Fan, M. Sun and J. Hou, *Sci. Rep.*, 2014, **4**, 6570.
